# Supplementary material for: Enhancing AlphaFold-Multimer-based Protein Complex Structure Prediction with MULTICOM in CASP15
Source: PubMed Central journal article supplement — bioRxiv. 2023 May 18:2023.05.16.541055. Preprint. [Version 1] doi: 10.1101/2023.05.16.541055 (PMC10245707; doi:10.1101/2023.05.16.541055), 2023-05-18
Supplement: NIHPP2023.05.16.541055v1-supplement-1.pdf [file NIHPP2023.05.16.541055v1-supplement-1.pdf]

## Supplementary Materials

**Table S1.** 19 kinds of combinations of  $MSA_{\text{paired}}$  and structural templates for homo-multimer targets.

| MSA and Template Combinations | $MSA_{\text{paired}}$          |                    | Structural templates       |
|-------------------------------|--------------------------------|--------------------|----------------------------|
|                               | Sequence database              | Interaction source | Template database          |
| <i>default_multimer</i>       | UniRef30, BFD, MGnify clusters | -                  | pdb70                      |
| <i>default_pdb</i>            | UniRef30, BFD, MGnify clusters | -                  | pdb_sort90                 |
| <i>default_pdb70</i>          | UniRef30, BFD, MGnify clusters | -                  | pdb70                      |
| <i>default_comp</i>           | UniRef30, BFD, MGnify clusters | -                  | pdb_complex                |
| <i>default_struct</i>         | UniRef30, BFD, MGnify clusters | -                  | pdb_complex                |
| <i>default_af</i>             | UniRef30, BFD, MGnify clusters | -                  | Predicted chain structures |

|                              |                                                                             |                    |                            |
|------------------------------|-----------------------------------------------------------------------------|--------------------|----------------------------|
| <i>default_img</i>           | UniRef90, Integrated Microbial Genomes (IMG), metagenome sequence databases | -                  | pdb70                      |
| <i>uniclust_oxmatch_a3m</i>  | UniClust30                                                                  | Species annotation | pdb70                      |
| <i>spec_iter_uniref_a3m</i>  | UniRef30                                                                    | Species annotation | pdb70                      |
| <i>spec_iter_uniref_sto</i>  | UniRef90                                                                    | Species annotation | pdb70                      |
| <i>spec_iter_uniprot_sto</i> | UniProt                                                                     | Species annotation | pdb70                      |
| <i>spec_pdb</i>              | UniRef30                                                                    | Species annotation | pdb_sort90                 |
| <i>spec_pdb70</i>            | UniRef30                                                                    | Species annotation | pdb70                      |
| <i>spec_comp</i>             | UniRef30                                                                    | Species annotation | pdb_complex                |
| <i>spec_struct</i>           | UniRef30                                                                    | Species annotation | pdb_complex                |
| <i>spec_af</i>               | UniRef30                                                                    | Species annotation | Predicted chain structures |
| <i>pdb_iter_uniref_a3m</i>   | UniRef30                                                                    | PDB                | pdb70                      |
| <i>pdb_iter_uniref_sto</i>   | UniRef90                                                                    | PDB                | pdb70                      |
| <i>pdb_iter_uniprot_sto</i>  | UniProt                                                                     | PDB                | pdb70                      |

**Table S2.** 29 kinds of combinations of  $MSA_{\text{paired}}$ ,  $MSA_{\text{unpaired}}$  and structural templates for hetero-multimer targets.

| MSA & Template Combination | $MSA_{\text{paired}}$ |                    | $MSA_{\text{unpaired}}$        | Structural template |               |
|----------------------------|-----------------------|--------------------|--------------------------------|---------------------|---------------|
|                            | Sequence database     | Interaction source | Sequence database              | Template database   | Concatenation |
| <i>default_multimer</i>    | UniProt               | Species annotation | UniRef30, BFD, MGnify clusters | pdb_seqres          | -             |
| <i>default_pdb</i>         | UniProt               | Species annotation | UniRef30, BFD, MGnify clusters | pdb_sort90          | PDB code      |
| <i>default_pdb70</i>       | UniProt               | Species annotation | UniRef30, BFD, MGnify clusters | pdb70               | PDB code      |
| <i>default_comp</i>        | UniProt               | Species annotation | UniRef30, BFD, MGnify clusters | pdb_complex         | PDB code      |
| <i>default_struct</i>      | UniProt               | Species annotation | UniRef30, BFD, MGnify clusters | pdb_complex         | PDB code      |

|                              |            |                      |                                |                            |          |
|------------------------------|------------|----------------------|--------------------------------|----------------------------|----------|
| <i>default_af</i>            | UniProt    | Species annotation   | UniRef30, BFD, MGnify clusters | Predicted chain structures | -        |
| <i>uniclust_oxmatch_a3m</i>  | UniClust30 | Species annotation   | UniRef30, BFD, MGnify clusters | pdb_seqres                 | -        |
| <i>spec_iter_uniref_a3m</i>  | UniRef30   | Species annotation   | UniRef30, BFD, MGnify clusters | pdb_seqres                 | -        |
| <i>spec_iter_uniref_sto</i>  | UniRef90   | Species annotation   | UniRef30, BFD, MGnify clusters | pdb_seqres                 | -        |
| <i>spec_iter_uniprot_sto</i> | UniProt    | Species annotation   | UniRef30, BFD, MGnify clusters | pdb_seqres                 | -        |
| <i>spec_pdb</i>              | UniRef30   | Species annotation   | UniRef30, BFD, MGnify clusters | pdb_sort90                 | PDB code |
| <i>spec_pdb70</i>            | UniRef30   | Species annotation   | UniRef30, BFD, MGnify clusters | pdb70                      | PDB code |
| <i>spec_comp</i>             | UniRef30   | Species annotation   | UniRef30, BFD, MGnify clusters | pdb_complex                | PDB code |
| <i>spec_struct</i>           | UniRef30   | Species annotation   | UniRef30, BFD, MGnify clusters | pdb_complex                | PDB code |
| <i>spec_af</i>               | UniRef30   | Species annotation   | UniRef30, BFD, MGnify clusters | Predicted chain structures | -        |
| <i>unidist_uniref_a3m</i>    | UniRef30   | UniProt accession ID | UniRef30, BFD, MGnify clusters | pdb_seqres                 | -        |
| <i>unidist_uniref_sto</i>    | UniRef90   | UniProt accession ID | UniRef30, BFD, MGnify clusters | pdb_seqres                 | -        |
| <i>unidist_uniprot_sto</i>   | UniProt    | UniProt accession ID | UniRef30, BFD, MGnify clusters | pdb_seqres                 | -        |
| <i>str_iter_uniref_a3m</i>   | UniRef30   | STRING database      | UniRef30, BFD, MGnify clusters | pdb_seqres                 | -        |
| <i>str_iter_uniref_sto</i>   | UniRef90   | STRING database      | UniRef30, BFD, MGnify clusters | pdb_seqres                 | -        |
| <i>str_iter_uniprot_sto</i>  | UniProt    | STRING database      | UniRef30, BFD, MGnify clusters | pdb_seqres                 | -        |
| <i>str_pdb</i>               | UniRef90   | STRING database      | UniRef30, BFD, MGnify clusters | pdb_sort90                 | PDB code |
| <i>str_pdb70</i>             | UniRef90   | STRING database      | UniRef30, BFD, MGnify clusters | pdb70                      | PDB code |

|                             |          |                 |                                |                            |          |
|-----------------------------|----------|-----------------|--------------------------------|----------------------------|----------|
| <i>str_comp</i>             | UniRef90 | STRING database | UniRef30, BFD, MGnify clusters | pdb_complex                | PDB code |
| <i>str_struct</i>           | UniRef90 | STRING database | UniRef30, BFD, MGnify clusters | pdb_complex                | PDB code |
| <i>str_af</i>               | UniRef90 | STRING database | UniRef30, BFD, MGnify clusters | Predicted chain structures | PDB code |
| <i>pdb_iter_uniref_a3m</i>  | UniRef30 | PDB             | UniRef30, BFD, MGnify clusters | pdb_seqres                 | -        |
| <i>pdb_iter_uniref_sto</i>  | UniRef90 | PDB             | UniRef30, BFD, MGnify clusters | pdb_seqres                 | -        |
| <i>pdb_iter_uniprot_sto</i> | UniProt  | PDB             | UniRef30, BFD, MGnify clusters | pdb_seqres                 | -        |

**Table S3.** The average TM-score of the best of five models of the top 15 out of 26 server predictors including NBIS-AF2-multimer (the standard AlphaFold-Multimer predictor) on the 41 multimers, 14 TBM multimers, 27 TBM/FM and FM multimers. When calculating the average TM-score, if a predictor did not submit a prediction for a target, the TM-score is set to 0. The bold font highlights the best result. The underline denotes the second best result.

| Server predictor  | Sum of Z-scores (> 0.0) | Avg TM-score on 41 multimers | Avg TM-score on 14 TBM multimers | Avg TM-score on 27 FM and FM/TBM multimers | Target count |
|-------------------|-------------------------|------------------------------|----------------------------------|--------------------------------------------|--------------|
| Yang-Multimer     | <b>28.4019</b>          | 0.7542                       | <b>0.8619</b>                    | 0.6984                                     | 39           |
| MULTICOM_deep     | <u>24.6154</u>          | 0.7781                       | 0.8536                           | 0.7389                                     | 41           |
| MULTICOM_qa       | 23.1823                 | <u>0.7963</u>                | <u>0.8541</u>                    | <u>0.7663</u>                              | 41           |
| Manifold-E        | 22.8345                 | <b>0.8161</b>                | 0.8504                           | <b>0.7984</b>                              | 41           |
| DFolding-server   | 20.2187                 | 0.6816                       | 0.7835                           | 0.6287                                     | 36           |
| ColabFold         | 18.3899                 | 0.6715                       | 0.7584                           | 0.6265                                     | 39           |
| UltraFold_Server  | 18.2015                 | 0.7641                       | 0.7999                           | 0.7456                                     | 41           |
| MultiFOLD         | 17.4288                 | 0.6900                       | 0.7671                           | 0.6500                                     | 41           |
| Kiharalab_Server  | 16.561                  | 0.6995                       | 0.7839                           | 0.6557                                     | 40           |
| MUFold            | 16.4772                 | 0.7478                       | 0.8481                           | 0.6958                                     | 41           |
| NBIS-AF2-multimer | 14.8905                 | 0.7375                       | 0.8438                           | 0.6824                                     | 41           |
| RaptorX-Multimer  | 14.7853                 | 0.7061                       | 0.8168                           | 0.6487                                     | 40           |
| DFolding-refine   | 12.8844                 | 0.6973                       | 0.8362                           | 0.6253                                     | 36           |
| GuijunLab-DeepDA  | 12.6262                 | 0.7361                       | 0.8309                           | 0.6870                                     | 41           |
| Yang-Server       | 12.2828                 | 0.3839                       | 0.6557                           | 0.2430                                     | 19           |

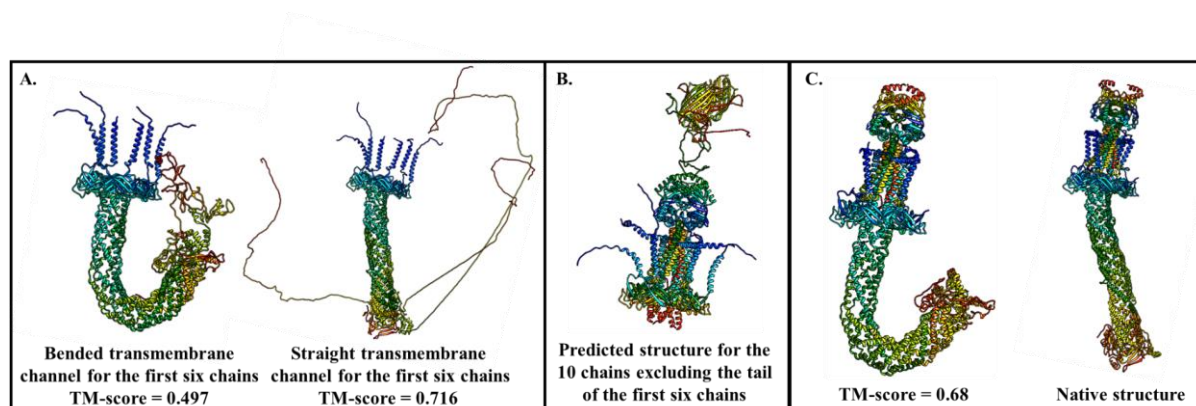

**Figure S1. A.** The two conformations (with TM-score = 0.497 and 0.716) of predicted complex structure for the first six chains of H1137 (A1B1C1D1E1F1); **B.** The predicted structure for the 10 chains excluding the tail of the first six chains; **C.** The native structure and the full-length complex structure (TM-score = 0.68) for H1137 built from the bended transmembrane channel for the first six chains (**left structure in plot A**) and the predicted structure for the 10 chains excluding the tail of the first six chains (**structure in plot B**).
